# Supplementary material for: Monodispersed Pd clusters generated in situ by their own reductive support for high activity and stability in cross-coupling reactions
Source: Royal Society of Chemistry journal article supplement (doi:10.1039/c4ta01811g), 2014-05-28
Supplement: c4ta01811g1.pdf [file c4ta01811g1.pdf]

# **Monodispersed Pd clusters generated in situ by their own reductive support for high activity and stability in cross-coupling reactions**

**Ping Li, Pei-Pei Huang, Fang-Fang Wei, Yong-Bin Sun, Chang-Yan Cao and Wei-Guo Song\***

*Beijing National Laboratory for Molecular Sciences (BNLMS), CAS Key Laboratory of Molecular Nanostructures and Nanotechnology, Institute of Chemistry, Chinese Academy of Sciences, Beijing, 100190, P. R. China. E-mail: [wsong@iccas.ac.cn](mailto:wsong@iccas.ac.cn); Fax: (+86) 10-62557908*

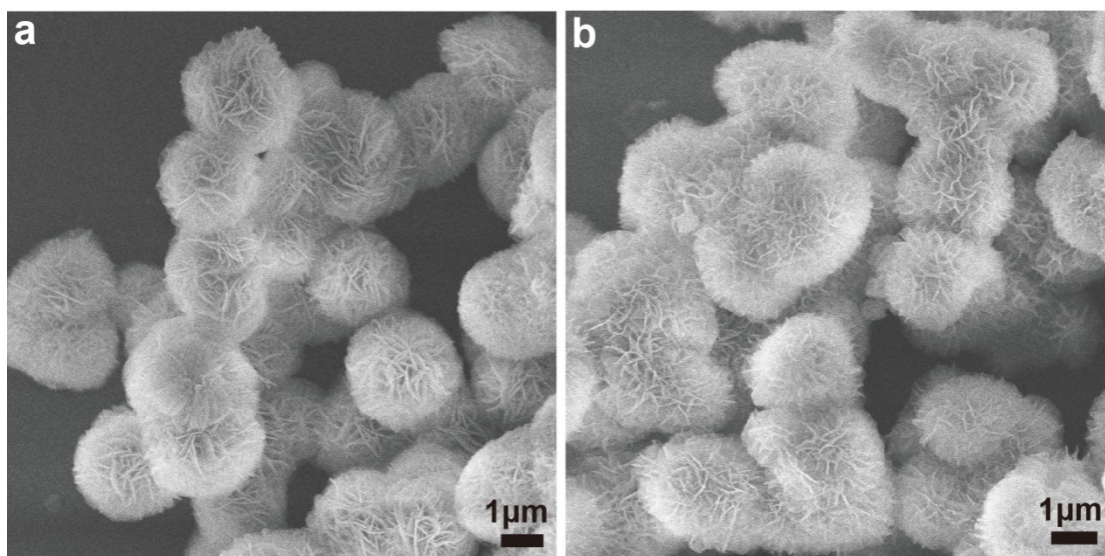

**Figure S1.** SEM images of (a) CoAl-LDH and (b) CoAl-LDH/Pd nanocomposite.

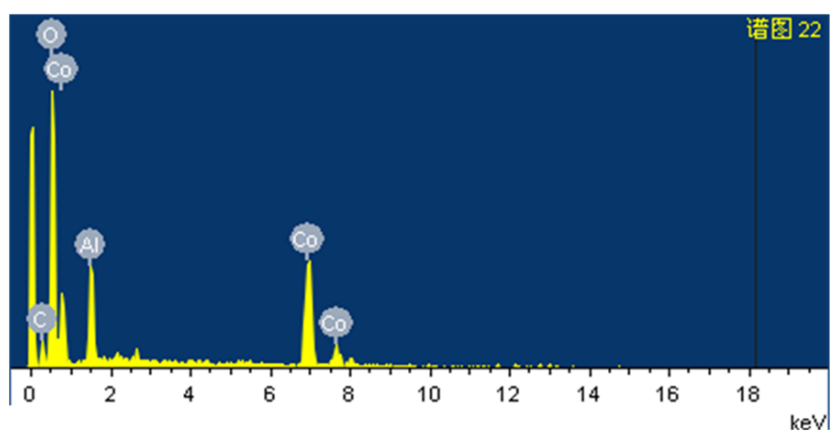

**Figure S2.** The EDS spectrum of the CoAl-LDH sample.

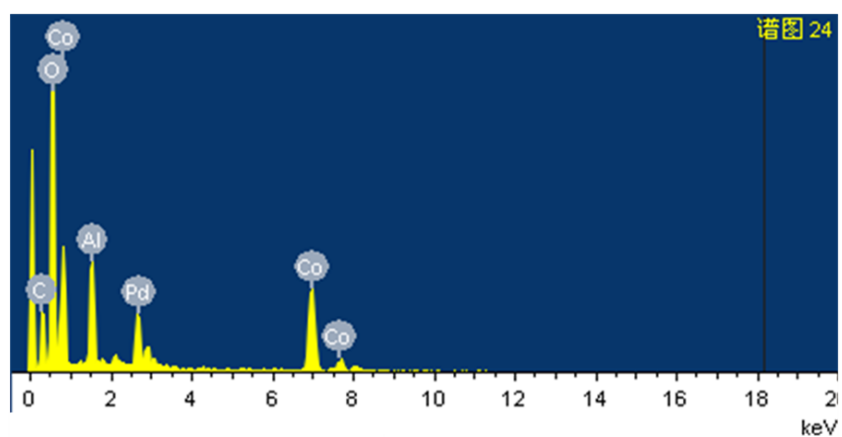

**Figure S3.** The EDS spectrum of the CoAl-LDH/Pd nanocomposite.

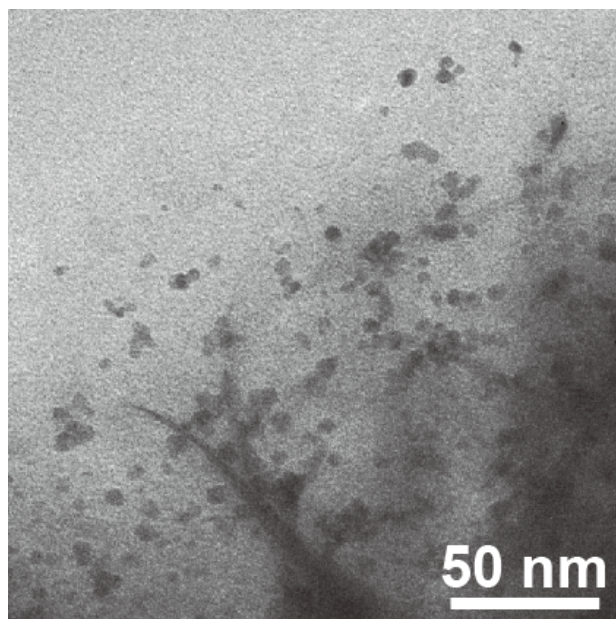

**Figure S4.** The high magnification TEM image of CoAl-LDH/Pd catalyst after being used repetitively for 6 times.

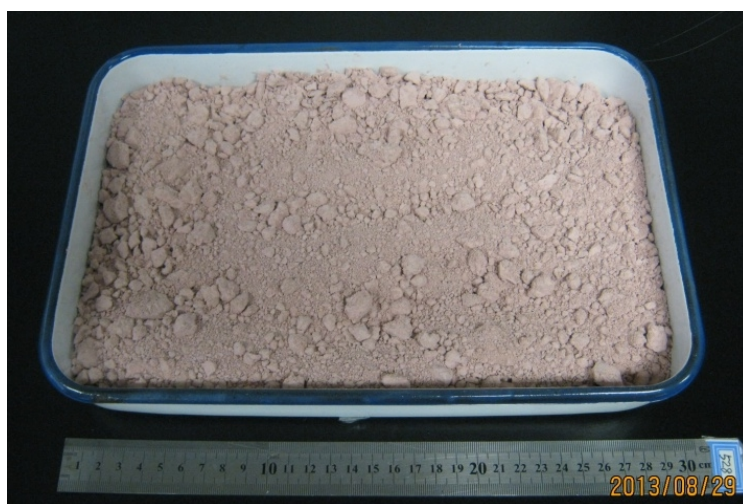

**Figure S5.** Photo of about 200 g of CoAl-LDH material from a scale up process.

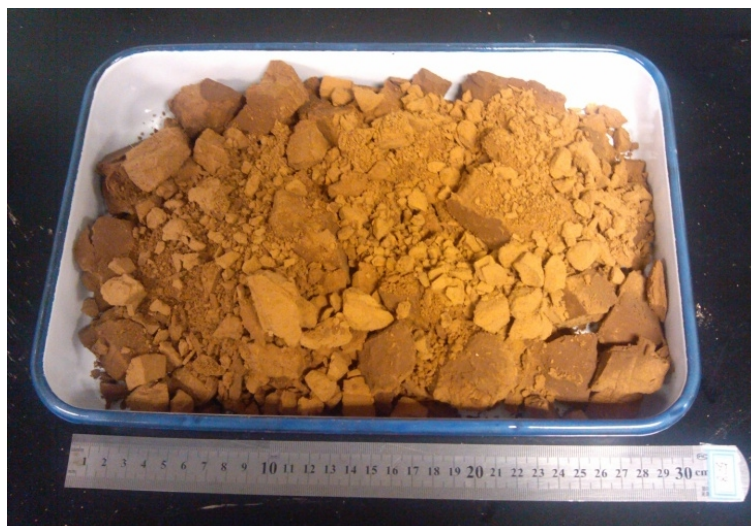

**Figure S6.** Photo of CoAl-LDH/Pd material (without the drying process) from a scale up process.
